# Supplementary material
Source: HighWire-hosted journal article supplement (https://srh.bmj.com/highwire/filestream/141733/field_highwire_adjunct_files/2/bmjsrh-2021-201064supp003_data_supplement.pdf)
Supplement: bmjsrh-2021-201064supp003_data_supplement.pdf [file bmjsrh-2021-201064supp003_data_supplement.pdf]

### Appendix 3. Current clinical pathway suggested by the Association of Primary Care Surgeons of the United Kingdom for postal post-vasectomy semen analysis (PVSA) submission and interpretation

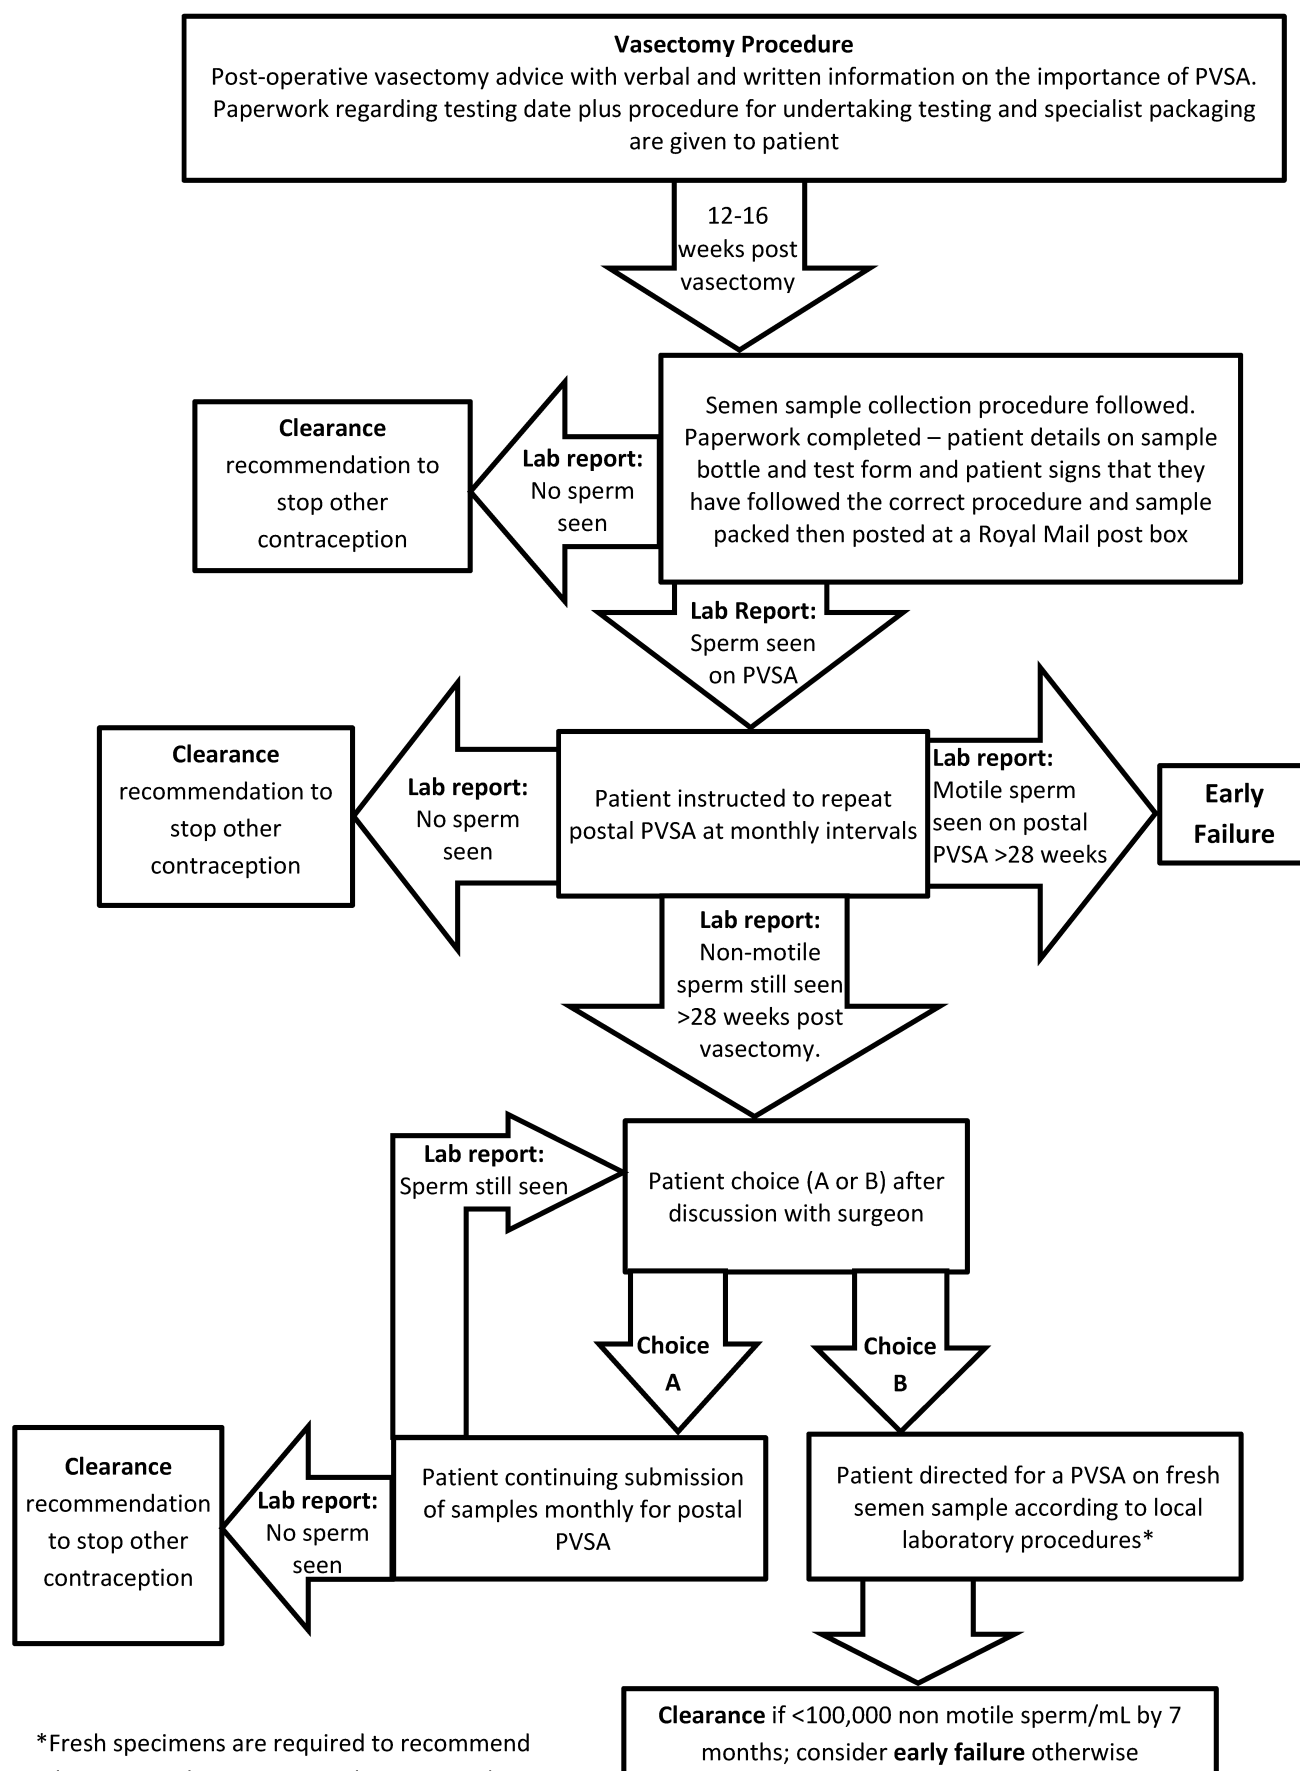

\*Fresh specimens are required to recommend clearance with rare non motile sperm and to diagnose early failure with postal PVSA strategy
